# Supplementary material for: Comparing Securitized and Balance Sheet Loans: Size Matters
Source: Atypon-hosted journal article supplement (doi:10.1287/mnsc.2015.2260), 2015-11-25
Supplement: mnsc.2015.2260-sm-ms_onlineappendix.pdf [file mnsc.2015.2260-sm-ms_onlineappendix.pdf]

# Comparing Securitized and Balance Sheet Loans: Size Matters\*

## Online Appendix

Andra Ghent and Rossen Valkanov<sup>†</sup>

May 25, 2015

We assemble a unique dataset of commercial mortgages with information on loan characteristics at origination and subsequent performance. The most significant difference between securitized and balance sheet loans is the size of the loan. The loans in the highest loan size decile have a 43% percent chance of securitization whereas the ones in the lowest decile have only a 1% chance. This result is consistent with diversification being a key motivation for securitization. We also find that loans that require substantial monitoring are less likely to be securitized. Finally, securitized loans get resolved less quickly after defaulting.

JEL classification: G21, G23, G20.

Keywords: Securitization; Commercial Mortgage-Backed Securities (CMBSs); Structured finance.

---

\*We have benefited from comments from an anonymous referee, Wayne Archer, Jennifer Dlugosz, Joey Engelberg, Karsten Hansen, Mike Hertzel, Dwight Jaffee, Lubo Litov, Chris Parsons, Marti Subrahmanyam, Allan Timmermann, Walter Torous as well as seminar participants at Arizona State University, BEROCC's (Belarussian Economic Research and Outreach Center) Third Annual International Economics Conference, the European Finance Association (EFA) annual meeting, the Federal Reserve Bank of San Francisco, the FIRS annual meeting, the FSU/UF Symposium, the University of California (Berkeley), the University of Oklahoma, the University of Vienna, and the University of Wisconsin (Madison). A previous version of this paper circulated under the title "Advantages and Disadvantages of Securitization: Evidence from Commercial Mortgages". We are extremely grateful to Real Capital Analytics for providing us with our data. We also thank TREPP for providing us with academic pricing. We thank Yue Cao and Sean Flynn for excellent research assistance.

<sup>†</sup>Ghent: Real Estate and Urban Land Economics Department, University of Wisconsin (Madison); andraghent@gmail.com. Valkanov: Finance Department, University of California, San Diego; rvalkanov@ucsd.edu.

# A Appendix

## A.1 Additional Empirical Results

Table 1: Probit Estimation of Loan Securitization, Robustness

|                                     | (1)                            | (2)                            | (3)                            | (4)                        | (5)                          | (6)                        |
|-------------------------------------|--------------------------------|--------------------------------|--------------------------------|----------------------------|------------------------------|----------------------------|
|                                     | 2005-2007 Originations Only    |                                |                                |                            |                              | Ex. NYC                    |
| Constant                            | -1.30***<br>(0.22)             | -1.43***<br>(0.23)             | -3.44***<br>(0.48)             | -3.64***<br>(0.45)         | 0.26<br>(0.57)               | -3.27***<br>(0.40)         |
| Log Loan Amount                     | 0.48***<br>(0.04)              | 0.49***<br>(0.04)              | 0.59***<br>(0.06)              |                            | 0.40***<br>(0.07)            | 0.51***<br>(0.06)          |
| Log Lender Assets                   |                                |                                | 0.14***<br>0.03<br>3.0%        | 0.22***<br>0.03<br>5.6%    |                              |                            |
| Loan Amt./ Lender Assets            |                                |                                |                                | 21.10**<br>8.78<br>544%    |                              |                            |
| Development (LTV $\geq 1$ )         | -1.20***<br>(0.22)             | -1.20***<br>(0.22)             | -1.87***<br>(0.40)             | -1.79***<br>(0.41)         | -1.83***<br>(0.41)           | -1.31***<br>(0.40)         |
| LTV                                 | -0.20<br>(0.15)                | -0.20<br>(0.15)                | 0.13<br>(0.28)                 | 0.76***<br>(0.27)          | 0.07<br>(0.32)               | -0.86**<br>(0.34)          |
| Price per Square Foot               | -0.34*<br>(0.19)               | -0.34*<br>(0.19)               | -0.04<br>(0.25)                | 0.19<br>(0.22)             | 0.03<br>(0.36)               | 0.24<br>(0.42)             |
| CBD                                 | -0.0085%<br>-0.68***<br>(0.16) | -0.0086%<br>-0.69***<br>(0.16) | -0.0008%<br>-0.75***<br>(0.25) | 0.0050%<br>-0.00<br>(0.21) | 0.0007%<br>-0.55**<br>(0.25) | 0.0004%<br>-0.37<br>(0.23) |
| Multi-building                      | -17%<br>0.26<br>(0.17)         | -17%<br>0.25<br>(0.17)         | -16%<br>0.60*<br>(0.32)        | -0%<br>1.03***<br>(0.28)   | -13%<br>0.22<br>(0.29)       | -6%<br>0.25<br>(0.21)      |
| Depository US Inst.                 |                                | 6.5%<br>0.19**<br>0.09<br>4.7% | 6.4%                           | 12.9%                      | 26.5%                        | 5.5%<br>4.3%               |
| Orig. Yr. FEs                       | Yes                            | Yes                            | Yes                            | Yes                        | Yes                          | Yes                        |
| MSA FEs                             | Yes                            | Yes                            | Yes                            | Yes                        | Yes                          | Yes                        |
| Prop. Age FEs (<1960, 60-80, 80-00) | Yes                            | Yes                            | Yes                            | Yes                        | Yes                          | Yes                        |
| Borrower Type FEs                   | Yes                            | Yes                            | Yes                            | Yes                        | Yes                          | Yes                        |
| Originator FEs                      | No                             | No                             | No                             | No                         | Yes                          | No                         |
| Number of Obs.                      | 1306                           | 1306                           | 615                            | 615                        | 403                          | 1120                       |
| Pseudo- $R^2$                       | 23%                            | 23%                            | 35%                            | 22%                        | 37%                          | 34%                        |

Notes: The table contains estimates of a probit where the dependent variable takes a value of 1 if the loan is securitized and 0 otherwise (equation (2) in the text). In all six specifications, the first entry for each variable is the coefficient, the second entry (in parentheses) is the robust standard error, and the third entry is the effect of a 1 unit change in the independent variable (the other characteristics are held fixed at their actual values). In all specifications, we include year and MSA fixed effects. The specifications in columns 3 and 4 include only loans originated by depository US institutions and for which we have asset information on the lender in the quarter the loan is originated. The specification in column 5 includes only loans originated by the largest 10 originators that originate both balance sheet and CMBS loans in our sample. \*\*\* and \*\* denote significance at the 1% and 5% levels. Coefficients and standard errors shown on Price per Square Foot are  $\times 10^3$ . The specifications in columns 1-5 include all loans originated 2005-2007. The specification in column 6 includes all loans originated 2005-2012 but excludes loans on NYC property.

Table 2: Alternative Definitions of Development Loan

|                                         | (1)                | (2)                | (3)                | (4)                | (5)                |
|-----------------------------------------|--------------------|--------------------|--------------------|--------------------|--------------------|
| Constant                                | -2.78***<br>(0.23) | -2.72***<br>(0.23) | -2.66***<br>(0.24) | -2.56***<br>(0.24) | -2.50***<br>(0.24) |
| Log Loan Amount                         | 0.48***<br>(0.04)  | 0.48***<br>(0.04)  | 0.48***<br>(0.04)  | 0.48***<br>(0.04)  | 0.52***<br>(0.04)  |
| Development (LTV>=1, benchmark)         | -1.19***<br>(0.21) |                    |                    |                    |                    |
| Development (LTV>=1.05)                 |                    | -1.06***<br>(0.25) |                    |                    |                    |
| Development (LTV>=1.1)                  |                    |                    | -1.01***<br>(0.28) |                    |                    |
| Development (LTV>=1.15)                 |                    |                    |                    | -0.75***<br>(0.29) |                    |
| Development (Stated Borrower Objective) |                    |                    |                    |                    | -0.90***<br>(0.16) |
| LTV                                     | -0.21<br>(0.15)    | -0.36**<br>(0.17)  | -0.45***<br>(0.18) | -0.61***<br>(0.18) | -0.82***<br>(0.15) |
| Price per Square Foot                   | -0.39**<br>(0.18)  | -0.41**<br>(0.18)  | -0.43**<br>(0.18)  | -0.44**<br>(0.18)  | -0.48**<br>(0.20)  |
| CBD                                     | -0.65***<br>(0.15) | -0.66***<br>(0.15) | -0.65***<br>(0.15) | -0.66***<br>(0.15) | -0.67***<br>(0.15) |
| Multi-building                          | 0.26<br>(0.16)     | 0.23<br>(0.16)     | 0.23<br>(0.15)     | 0.23<br>(0.15)     | 0.21<br>(0.16)     |
| Orig. Yr. FEs                           | Yes                | Yes                | Yes                | Yes                | Yes                |
| MSA FEs                                 | Yes                | Yes                | Yes                | Yes                | Yes                |
| Prop. Age FEs                           | Yes                | Yes                | Yes                | Yes                | Yes                |
| Borrower Type FEs                       | Yes                | Yes                | Yes                | Yes                | Yes                |
| Number of Obs.                          | 1,962              | 1,962              | 1,962              | 1,962              | 1,962              |
| Pseudo- $R^2$                           | 0.32               | 0.32               | 0.31               | 0.31               | 0.33               |

Notes: The table contains estimates of a probit where the dependent variable takes a value of 1 if the loan is securitized and 0 otherwise (equation (2) in the text). In all specifications, the first entry for each variable is the coefficient and the second entry (in parentheses) is the robust standard error. In all specifications, we include year and MSA fixed effects. The specification in column 5 defines a development loan as one for which the borrower states its intention as “Redevelopment” or “Renovation” rather than one of the other options (“Investment”, “Occupancy”, or “Condo Conversion”). \*\*\* and \*\* denote significance at the 1% and 5% levels. Coefficients and standard errors shown on Price per Square Foot are  $\times 10^3$ .

Table 3: Probit Estimation of Loan Securitization from Structural Model, Loans Originated by Non-Depository Institutions

|                                      | (1)                | (2)                 | (3)                 | (4)                 | (5)                 | (6)                 |
|--------------------------------------|--------------------|---------------------|---------------------|---------------------|---------------------|---------------------|
|                                      | Full Sample        |                     |                     | Non-Depository      |                     |                     |
|                                      | $\alpha = 1$       | $\alpha = 0.9$      | $\alpha = 0.8$      | $\alpha = 1$        | $\alpha = 0.9$      | $\alpha = 0.8$      |
| Constant                             | -3.00***<br>(0.25) | -3.01***<br>(0.25)  | -3.01***<br>(0.25)  | -4.23**<br>(1.81)   | -4.23**<br>(1.81)   | -4.23**<br>(1.81)   |
| Log Loan Amount                      | 0.50***<br>(0.04)  | 0.50***<br>(0.04)   | 0.50***<br>(0.04)   | 0.34***<br>(0.07)   | 0.34***<br>(0.07)   | 0.34***<br>(0.07)   |
| Development (LTV $\geq 1$ )          | -1.22***<br>(0.25) | -1.23***<br>(0.25)  | -1.23***<br>(0.25)  | -0.92**<br>(0.38)   | -0.92**<br>(0.38)   | -0.93**<br>(0.39)   |
| LTV                                  | -0.23<br>(0.15)    | -0.23<br>(0.15)     | -0.22<br>(0.15)     | -0.47<br>(0.32)     | -0.47<br>(0.32)     | -0.46<br>(0.32)     |
| Price per Square Foot                | -0.42**<br>(0.19)  | -0.43**<br>(0.19)   | -0.43**<br>(0.19)   | -0.39<br>(0.37)     | -0.40<br>(0.38)     | -0.41<br>(0.38)     |
| CBD                                  | -0.67***<br>(0.16) | -0.67***<br>(0.16)  | -0.67***<br>(0.16)  | -0.37<br>(0.30)     | -0.37<br>(0.31)     | -0.36<br>(0.31)     |
| Multi-building                       | 0.25<br>(0.16)     | 0.25<br>(0.16)      | 0.25<br>(0.16)      | 0.12<br>(0.36)      | 0.12<br>(0.36)      | 0.12<br>(0.36)      |
| Depository US Inst.                  | 0.22***<br>(0.08)  | 0.22***<br>(0.08)   | 0.22***<br>(0.08)   |                     |                     |                     |
| $\hat{\varepsilon}_{i,t}^{DISTRESS}$ | 0.0368<br>(0.0706) | -0.0017<br>(0.0735) | -0.0483<br>(0.0768) | -0.0598<br>(0.1590) | -0.1150<br>(0.2936) | -0.1905<br>(0.6382) |
| Orig. Yr. FEs (2005, 2006, and 2007) | Yes                | Yes                 | Yes                 | Yes                 | Yes                 | Yes                 |
| MSA FEs                              | Yes                | Yes                 | Yes                 | Yes                 | Yes                 | Yes                 |
| Prop. Age FEs (<1960, 60-80, 80-00)  | Yes                | Yes                 | Yes                 | Yes                 | Yes                 | Yes                 |
| Borrower Type FEs                    | Yes                | Yes                 | Yes                 | Yes                 | Yes                 | Yes                 |
| Number of Obs.                       | 1962               | 1962                | 1962                | 652                 | 652                 | 652                 |
| Pseudo- $R^2$                        | 34%                | 34%                 | 34%                 | 32%                 | 32%                 | 33%                 |

Notes: The table contains estimates of a probit where the dependent variable takes a value of 1 if the loan is securitized and 0 otherwise (equation (3) in the text). The independent variables  $x_{i,t-1}$  are the same as in Table 3. We identify the distress variable  $\varepsilon_{i,t}^{DISTRESS}$  using default rates of the loans (see section 4) under the assumptions about the value of  $\alpha$  stated. The assumption that  $\alpha = 1$  corresponds to no difference in the likelihood of distressed CMBS loans entering into default relative to balance sheet loans. Values of  $\alpha < 1$  imply that distressed CMBS loans are more likely to default than distressed balance sheet loans. The estimates are obtained from a pooled dataset of all loans in our January 2005 to April 2012 sample. In all specifications, the first entry for each variable is the coefficient and the second entry (in parentheses) is the robust standard error. Standard errors are estimated using nonparametric bootstrap with 500 replications to take into account the fact that  $\varepsilon_{i,t}^{DISTRESS}$  was estimated rather than observed. \*\*\* and \*\* denote significance at the 1% and 5% levels. Coefficients and standard errors shown on Price per Square Foot are  $\times 10^3$ .

## A.2 Estimation Details

We have the index model:

$$\begin{aligned} \Pr(D_{i,t+1} = 1) &= (CMBS_{i,t} + \alpha(1 - CMBS_{i,t})) \Pr(\tilde{x}_{i,t-1}\eta + \varepsilon_{i,t+1}^{DISTRESS} > 0) \\ &= (CMBS_{i,t-1} + \alpha(1 - CMBS_{i,t-1})) F(\tilde{x}_{i,t-1}\eta). \end{aligned}$$

assuming that  $\varepsilon_{i,t+1}^{DISTRESS}$  has a symmetric cumulative distribution function  $F(\cdot)$ .

The density of  $D_{i,t+1}$  given  $\tilde{x}_{i,t-1}$ ,  $\eta$ ,  $\alpha$ , and  $CMBS_{i,t}$  is thus

$$f(D_{i,t+1} | \tilde{x}_{i,t-1}, \eta, \alpha) = \left\{ \begin{array}{l} [F(\tilde{x}_{i,t-1}\eta)]^{D_{i,t+1}} [1 - F(\tilde{x}_{i,t-1}\eta)]^{1-D_{i,t+1}} CMBS_{i,t} \\ [\alpha F(\tilde{x}_{i,t-1}\eta)]^{D_{i,t+1}} [1 - \alpha F(\tilde{x}_{i,t-1}\eta)]^{1-D_{i,t+1}} (1 - CMBS_{i,t}) \end{array} \right\}$$

so the log likelihood of observation  $i$  is

$$\begin{aligned} \ell_i(\eta) &= D_{i,t+1} \ln \{ [CMBS_{i,t} + \alpha(1 - CMBS_{i,t})] F(\tilde{x}_{i,t-1}\eta) \} \\ &\quad + (1 - D_{i,t+1}) \ln \{ 1 - [CMBS_{i,t} + \alpha(1 - CMBS_{i,t})] F(\tilde{x}_{i,t-1}\eta) \} \end{aligned}$$

and grouping observations by their securitization status we can write the log likelihood for the sample as

$$\begin{aligned} \mathcal{L}(\eta) &= \sum_{i=1}^{N_{CMBS}} \{ D_{i,t+1} \ln F(\tilde{x}_{i,t-1}\eta) + (1 - D_{i,t+1}) \ln (1 - F(\tilde{x}_{i,t-1}\eta)) \} \\ &\quad + \sum_{i=1}^{N_{BAL.SHEET}} \{ D_{i,t+1} \ln [\alpha F(\tilde{x}_{i,t-1}\eta)] + (1 - D_{i,t+1}) \ln (1 - \alpha F(\tilde{x}_{i,t-1}\eta)) \} \end{aligned}$$

which can be estimated using maximum likelihood.

We can thus take  $\hat{\varepsilon}_{i,t+1}^{DISTRESS}$  as an estimate of  $\varepsilon_{i,t}^{DISTRESS}$  to estimate (??). We follow Chesher and Irish (1987) in computing the generalized residuals as the derivative

of the log-likelihood of each observation with respect to the constant term, i.e.,

$$\begin{aligned}
\hat{\varepsilon}_{i,t+1} &= E(\varepsilon_{i,t+1}^{DISTRESS} | D_{i,t+1}, \tilde{x}_{i,t-1}, \eta, \alpha, CMBS_{i,t}) \\
&= \frac{\partial \ell_i(\eta)}{\partial \eta} \\
&= \left\{ \begin{array}{l} \frac{D_{i,t+1}f(\tilde{x}_{i,t-1}\eta)}{F(\tilde{x}_{i,t-1}\eta)} + \frac{-(1-D_{i,t+1})f(\tilde{x}_{i,t-1}\eta)}{1-F(\tilde{x}_{i,t-1}\eta)} CMBS_{i,t} \\ \frac{D_{i,t+1}f(\tilde{x}_{i,t-1}\eta)}{F(\tilde{x}_{i,t-1}\eta)} + \frac{-(1-D_{i,t+1})\alpha f(\tilde{x}_{i,t-1}\eta)}{1-\alpha F(\tilde{x}_{i,t-1}\eta)} (1 - CMBS_{i,t}) \end{array} \right\} \\
(1) \quad &= \left\{ \begin{array}{l} \frac{(D_{i,t+1}-F(\tilde{x}_{i,t-1}\eta))f(\tilde{x}_{i,t-1}\eta)}{F(\tilde{x}_{i,t-1}\eta)[1-F(\tilde{x}_{i,t-1}\eta)]} CMBS_{i,t} \\ \frac{(D_{i,t+1}-\alpha F(\tilde{x}_{i,t-1}\eta))f(\tilde{x}_{i,t-1}\eta)}{F(\tilde{x}_{i,t-1}\eta)[1-\alpha F(\tilde{x}_{i,t-1}\eta)]} (1 - CMBS_{i,t}) \end{array} \right\}
\end{aligned}$$

See also Cox and Snell (1968), Pagan and Vella (1989), and Greene (2000, pp. 916-917) for discussions of generalized residuals. Intuitively, the effect of  $\alpha$  in (1) is to increase the residual for balance sheet loans that do not default. If  $\alpha < 1$ , the balance sheet loans had on average higher risk than what we observe purely from the default and the factor  $\alpha$  corrects accordingly.
